# Supplementary material for: Development and characterization of three-dimensional antibacterial nanocomposite sponges of chitosan, silver nanoparticles and halloysite nanotubes
Source: Royal Society of Chemistry journal article supplement (doi:10.1039/d4ra04274c), 2024-01-01
Supplement: d4ra04274c1.pdf [file d4ra04274c1.pdf]

## Supplementary information

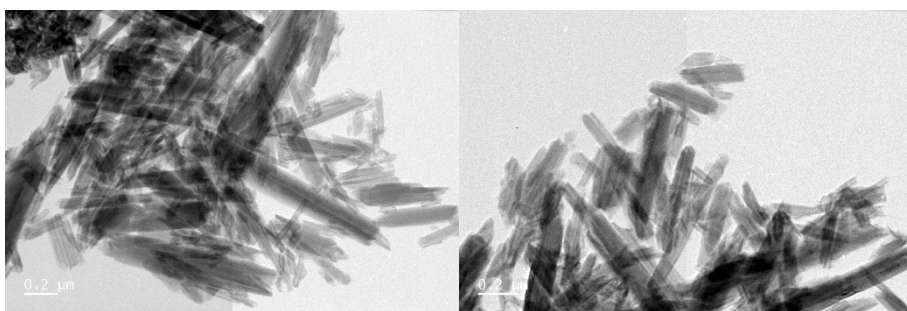

**Figure S1.** Representative TEM micrographs of pristine halloysite nanotubes.

### *E. coli*

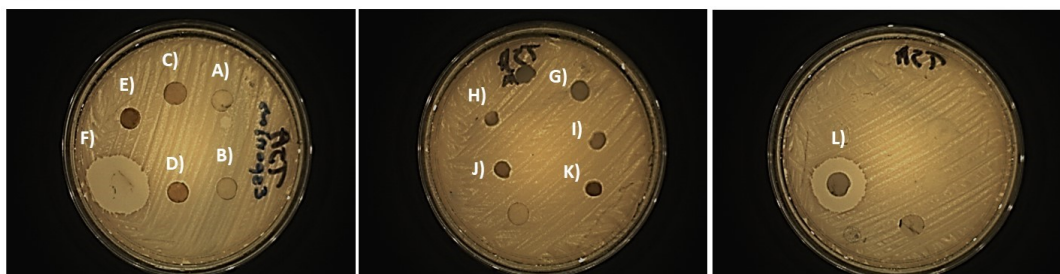

### *P. aeruginosa*

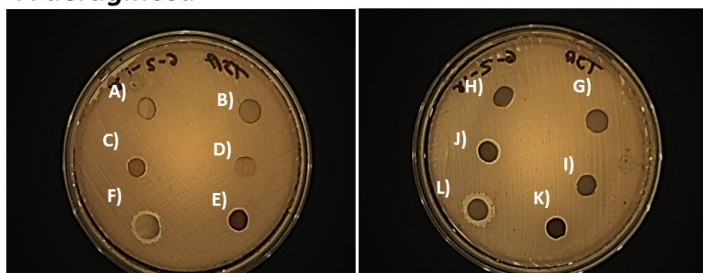

### *S. aureus*

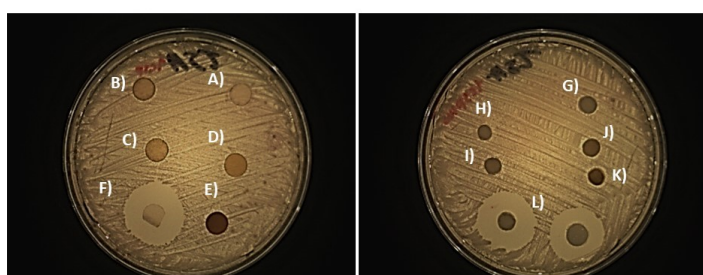

### *S. epidermidis*

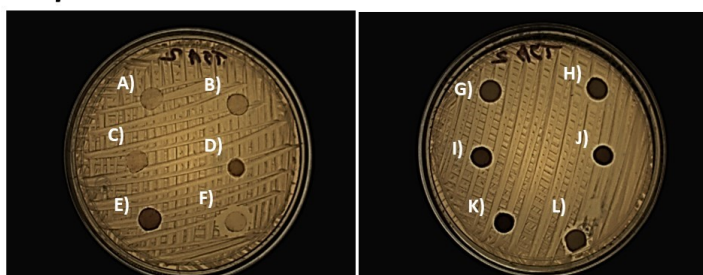

**Figure S2.** Inhibition halos of CTS-AgNP and CTS-HNT-AgNP sponges against Gram-negative and positive bacteria, each sponge is represented on the images as A) p-CTS, B) 01-CTS-AgNP, C) 02-CTS-AgNP, D) 05-CTS-AgNP, E) 10-CTS-AgNP, F) p-CTS sponge impregnated with chlorhexidine gluconate antiseptic, G) CTS-HNT, H) 01-CTS-HNT-AgNP, I) 02-CTS-HNT-AgNP, J) 05-CTS-HNT-AgNP, K) 10-CTS-HNT-AgNP and L) CTS-HNT sponge impregnated with chlorhexidine gluconate antiseptic. The results reported in the image are representative of one of the three independent experiments.

**Table S1. Inhibition halos of the nanocomposite sponges against Gram-negative and positive bacteria.**

| Sponge          | Inhibition zone (mm) |                      |                  |                       |
|-----------------|----------------------|----------------------|------------------|-----------------------|
|                 | <i>E. coli</i>       | <i>P. aeruginosa</i> | <i>S. aureus</i> | <i>S. epidermidis</i> |
| p-CTS           | 8.00 ± 0.00          | 8.00 ± 0.00          | 8.01 ± 0.01      | 8.00 ± 0.00           |
| 01-CTS-AgNP     | 8.01 ± 0.03          | 8.00 ± 0.00          | 8.01 ± 0.01      | 8.04 ± 0.05           |
| 02-CTS-AgNP     | 8.04 ± 0.06          | 8.11 ± 0.08          | 8.02 ± 0.03      | 8.02 ± 0.02           |
| 05-CTS-AgNP     | 8.69 ± 0.36          | 9.15 ± 0.03          | 8.07 ± 0.02      | 8.21 ± 0.09           |
| 10-CTS-AgNP     | 9.09 ± 0.10          | 9.28 ± 0.01          | 8.04 ± 0.03      | 9.00 ± 0.10           |
| p-CTS-CLG       | 27.1 ± 2.86*         | 17.3 ± 0.14*         | 30.1 ± 0.83*     | 19.9 ± 1.89*          |
| CTS-HNT         | 8.06 ± 0.12          | 8.03 ± 0.06          | 8.00 ± 0.00      | 8.03 ± 0.06           |
| 01-CTS-HNT-AgNP | 8.11 ± 0.10          | 8.09 ± 0.09          | 8.05 ± 0.04      | 8.04 ± 0.05           |
| 02-CTS-HNT-AgNP | 8.33 ± 0.15          | 8.11 ± 0.11          | 8.71 ± 0.34      | 9.03 ± 0.05           |
| 05-CTS-HNT-AgNP | 8.33 ± 0.10          | 9.78 ± 0.39*         | 9.01 ± 0.04      | 9.81 ± 0.31*          |
| 10-CTS-HNT-AgNP | 8.57 ± 0.09          | 10.8 ± 0.98*         | 9.78 ± 0.73      | 10.1 ± 0.15*          |
| CTS-HNT-CLG     | 24.5 ± 0.42*         | 15.6 ± 0.35*         | 29.4 ± 1.90*     | 15.4 ± 0.99*          |

CLG: chlorhexidine gluconate, \* The statistical difference was evaluated with Bonferroni's test at  $p \leq 0.05$  with respect to the p-CTS or CTS-HNT sponges, respectively.
